# Supplementary material
Source: ML conference proceedings conference paper supplement (https://proceedings.neurips.cc/paper_files/paper/2022/hash/5c261ccdc44fbd32fbb344fa578a1844-Abstract.html)
Supplement: Supplementary file 1 [file 5c261ccdc44fbd32fbb344fa578a1844-Supplemental-Conference.zip]

Archive with 24 entries (17 files):
- Code/
- Code/data/
- Code/data_preprocess/
- Code/data_preprocess/process_fmnist.py
- Code/data_preprocess/__pycache__/
- Code/data_preprocess/__pycache__/process_fmnist.cpython-36.pyc
- Code/log/
- Code/log/fmnist_trained_model/
- Code/log/fmnist_trained_model/fmnist-0.pt
- Code/log/fmnist_trained_model/fmnist-1.pt
- Code/log/fmnist_trained_model/fmnist-2.pt
- Code/log/fmnist_trained_model/fmnist-3.pt
- Code/log/fmnist_trained_model/fmnist-4.pt
- Code/log/fmnist_trained_model/fmnist-5.pt
- Code/log/fmnist_trained_model/fmnist-6.pt
- Code/log/fmnist_trained_model/fmnist-7.pt
- Code/log/fmnist_trained_model/fmnist-8.pt
- Code/log/fmnist_trained_model/fmnist-9.pt
- Code/main_fmnist.py
- Code/README.md
- Code/trainer/
- Code/trainer/PLAD_trainer_fmnist.py
- Code/VAE_fmnist.py
- Supplementary_Material.pdf
